1 Running title: Replication of SARS-CoV-2

2

3 **Development of an in vitro model for animal species susceptibility to SARS-CoV-2**  
4 **replication based on expression of ACE2 and TMPRSS2 in avian cells**

5

6 Darrell R. Kapczynski<sup>1</sup>, Ryan Sweeney, David L. Suarez, Erica Spackman Mary Pantin-  
7 Jackwood

8

9

10 Exotic and Emerging Avian Disease Research Unit, Southeast Poultry Research Laboratory, U.S.  
11 National Poultry Research Center, Agricultural Research Service, USDA, 934 College Station  
12 Road, Athens, GA 30605

13

14

15

16 <sup>1</sup>Address correspondence to Dr. Darrell R. Kapczynski, Southeast Poultry Research  
17 Laboratory/ARS/USDA, 934 College Station Road, Athens, Georgia 30605. Phone:  
18 706.546.3471; Fax: 706.546.3161; email: darrell.kapczynski@usda.gov

19

20

21

22

23 **ABSTRACT:** The SARS-CoV-2 (SC2) virus has caused a worldwide pandemic because of the  
24 virus's ability to transmit efficiently human-to-human. A key determinant of infection is the  
25 attachment of the viral spike protein to the host receptor angiotensin-converting enzyme 2  
26 (ACE2). Because of the presumed zoonotic origin of SC2, there is no practical way to assess  
27 every species susceptibility to SC2 by direct challenge studies. In an effort to have a better  
28 predictive model of animal host susceptibility to SC2, we expressed the ACE2 and/or  
29 transmembrane serine protease 2 (TMPRSS2) genes from humans and other animal species in  
30 the avian fibroblast cell line, DF1, that is not permissive to infection. We demonstrated that  
31 expression of both human ACE2 and TMPRSS2 genes is necessary to support SC2 infection and  
32 replication in DF1 and a non-permissive sub-lineage of MDCK cells. Titers of SC2 in these cell  
33 lines were comparable to those observed in control Vero cells. To further test the model, we  
34 developed seven additional transgenic cell lines expressing the ACE2 and TMPRSS2 derived  
35 from *Felis* (cat), *Equus* (horse), *Sus* (pig), *Capra* (goat), *Mesocricetus* (Golden hamster), *Myotis*  
36 *lucifugus* (Little Brown bat) and *Hipposideros armiger* (Great Roundleaf bat) in DF1 cells.  
37 Results demonstrate permissive replication of SC2 in cat, Golden hamster, and goat species, but  
38 not pig or horse, which correlated with the results of reported challenge studies. The  
39 development of this cell culture model allows for more efficient testing of the potential  
40 susceptibility of many different animal species for SC2 and emerging variant viruses.

41

42 **IMPORTANCE:** SARS-CoV-2 (SC2) is believed to have originated in animal species and  
43 jumped into humans where it has produced the greatest viral pandemic of our time. Identification  
44 of animal species susceptible to SC2 infection would provide information on potential zoonotic  
45 reservoirs, and transmission potential at the human-animal interface. Our work provides a model

46 system to test the ability of the virus to replicate in an otherwise non-permissive cell line by  
47 transgenic insertion of the ACE2 and TMPRSS2 genes from human and other animal species.  
48 The results from our in vitro model positively correlate with animal infection studies enhancing  
49 the predicative capability of the model. Importantly, we demonstrate that both proteins are  
50 required for successful virus replication. These findings establish a framework to test other  
51 animal species for susceptibility to infection that may be critical zoonotic reservoirs for  
52 transmission, as well as to test variant viruses that arise over time.

53

54 Keywords: SARS-CoV-2, ACE2, TMPRSS2, animal, replication, model

## 55 INTRODUCTION

56 The current COVID-19 pandemic is caused by the severe acute respiratory syndrome  
57 coronavirus 2 [SARS-CoV-2 (SC2)] which was first reported in Wuhan, China in late 2019. This  
58 virus most probably has its ecological reservoir in bats, and transmission of the virus to humans  
59 has likely occurred through an intermediate animal host which has not yet been identified (1, 2).  
60 Coronaviruses (CoVs) are a large family of viruses, several of which cause respiratory diseases  
61 in humans, from the common cold to more rare and serious diseases such as the Severe Acute  
62 Respiratory Syndrome (SARS) and the Middle East Respiratory Syndrome (MERS), both of  
63 which have high case fatality rates and were detected for the first time in 2002 and 2012,  
64 respectively.

65 CoVs are enveloped, single-stranded, positive-sense RNA viruses that belong to the  
66 subfamily *Orthocoronavirinae* within the family *Coronaviridae*, Order *Nidovirales*. The viruses  
67 are divided into four genera: alpha-, beta-, gamma- and delta-CoV based on phylogenetic and  
68 genomic structure (3, 4). All CoVs currently known to cause disease in humans belong to the  
69 alpha- or beta-CoV groups (5, 6). In addition, alpha-CoV, beta-CoV and gamma-CoV induce  
70 significant disease on various domestic animal species, including porcine transmissible  
71 gastroenteritis virus, porcine enteric diarrhea virus (PEDV), swine acute diarrhea syndrome  
72 coronavirus (SADS-CoV), and infectious bronchitis virus (IBV) in poultry (5-9). Based on  
73 sequence analysis, human coronaviruses have animal origins. The SARS-CoV, MERS-CoV,  
74 HCoV-NL63 and HCoV-229E are thought to have originated in bats, whereas HCoV-OC43 and  
75 HKU1 appear to have come from rodents (10). The 2002 SARS-CoV-1 recombined in civet cats  
76 and humans whereas the 2012 MERS-CoV appeared to have spread from bats to dromedary  
77 camels and then to humans (11-13).

78           The main surface protein of CoVs is the spike (S) protein that facilitates receptor binding  
79   and fusion of the viral lipid envelope with the host cell membrane. Receptor binding is facilitated  
80   by the S1 subunit while the S2 subunit is involved with fusion of the viral membrane with the  
81   cell membrane (14, 15). For these two events to occur, the S protein needs to be post-  
82   transitionally modified by two different host proteases to become activated. For SC2, furin-like  
83   proteases cleave the S protein at the S1/S2 site that contains a multiple basic amino acid motif  
84   (RRAR) that is different from SARS-CoV (16). The S protein undergoes additional cleavage at  
85   the S2' site by the cellular type II transmembrane serine protease, TMPRSS2 (17-19). However,  
86   other proteases have been described to activate CoVs including cathepsin L, TMPRSS11A and  
87   TMPRSS11D (20-23).

88           SARS-CoV and SC2 utilize the angiotensin-converting enzyme 2 (ACE2) as the receptor  
89   for attachment on host cells with the S protein (14). ACE-2 is a single-pass type I transmembrane  
90   protein, with its enzymatically active domain exposed on the surface of cells in lungs and other  
91   tissues. ACE2 catalyzes the conversion of angiotensin I into angiotensin 1-9 and angiotensin II  
92   into angiotensin1-7, which are involved with vasodilation effects in the cardiovascular system  
93   (24, 25). Due to conservations of the ACE2 gene among animal species, the potential host range  
94   of SC2 is thought to be extensive.

95           The ACE2 and TMPRSS2 genes have homologues in many animal species (1, 22).  
96   Several species, including house cats, ferrets, and golden hamsters, have been shown to be  
97   naturally and/or experimentally infected with SC2 (26). These three species have >80%  
98   sequence similarity in their ACE2 and TMPRSS2 genes when compared to the human genes.  
99   The chicken, which does not appear to be a susceptible host, has an ACE2 homology of less than  
100   70% to the human gene (27). However other species like pigs have a sequence similarity of

101 >80%, but are poorly susceptible to infection. Based on previous work with SARS-CoV, the  
102 binding of S1 to ACE2 can be defined by the interaction of relatively few amino acids, and  
103 predictions of host susceptibility based on these interactions have been made (1, 28). Despite the  
104 clear importance of the binding of the spike protein to ACE2, the prediction of host susceptibility  
105 does involve other factors including the level and tissue distribution of ACE2 expression and the  
106 requirement for protease activation.

107 Because chickens are not susceptible to SC2 virus, and their ACE2 and TMPRSS2  
108 protease are distinctly different from the human equivalents, we developed an avian cell line to  
109 screen the potential host range of infection of the virus through the expression the ACE2 and  
110 TMPRSS2 genes from human and animal species to provide novel insights into the receptor  
111 usage, replication and potential host range of SC2 These studies were designed to determine if  
112 the host restriction is strictly from the difference in the receptor and/or protease. One long-term  
113 goal of this work is to develop a predictive framework for improved epidemic surveillance to  
114 include protection of agriculturally relevant species and animal species that are hard to test  
115 experimentally.

116

## 117 MATERIALS AND METHODS

118 **Viruses.** The USA-WA1/2020 (BEI NR-58221, original material was provided by the US  
119 Centers for Disease Control and Prevention) isolate of SARS-CoV-2 (SC2) was obtained from  
120 BEI Research Resources Repository, National Institute of Allergy and Infectious Diseases,  
121 National Institutes of Health (29). The virus was propagated and titrated in ATCC-CCL-81 Vero  
122 cells and was utilized at 6 or 7 total passages in Vero cells. Experiments with SC2 were

123 performed in a biosafety level-3 enhanced facility with procedures approved by the U.S.  
124 National Poultry Research Center Institutional Biosafety Committee.

125 **Cell lines.** DF1 (avian fibroblast), Madin-Darby Canine Kidney (MDCK) and Vero (African  
126 Green monkey kidney, CCL-81) cells were seeded and propagated with standard procedures for  
127 adherent cells in flasks containing Dulbecco's Modified Eagle Medium (DMEM) (ThermoFisher  
128 Scientific, Waltham, MA) with 10% Fetal Bovine Serum (Sigma Chemical Company, St. Louis,  
129 MO) and 1% Antimicrobial-Antimycotic (GeminiBio, Sacramento, CA). At each passage  
130 adherent cells were disassociated with trypsin (GIBCO) when at 95-100% confluence and  
131 passaged. Cells were incubated (ThermoFisher Scientific) at 37°C with 5% CO<sub>2</sub>. Vero cells were  
132 obtained from the International Reagent Resource (FR-243). MDCK cells were obtained from  
133 ATCC and were included because this sub-lineage was not able to support SC2 replication,  
134 therefore could serve as an additional cell line to evaluate results (14).

135 **Construction of transgenic cell lines using lentivirus vectors expressing human ACE2 and**  
136 **TMPRSS2.** DF1 and MDCK cells were seeded at a density of  $0.5 \times 10^5$  in 500µl DMEM  
137 containing 10% Fetal Bovine Serum and 1% Antimicrobial-Antimycotic (Sigma), in one well  
138 each of a 12 well plate, and left overnight as above. Once cells reached 50-75% confluence, the  
139 media was removed and lentivirus particles were added, according to the manufacturer's  
140 recommendations. The lentivirus contained the human ACE2 gene under control of the CMV  
141 promoter along with green fluorescent protein (GFP) also under control of a separate CMV  
142 promoter (Origene Technologies, Rockville, MD). A MOI of 20 was used for lentivirus  
143 transduction. For TMPRSS2 transduction, lentivirus particles containing the human TMPRSS2  
144 gene under control of the CMV promoter and red fluorescent protein (RFP) gene under control

145 of a separate CMV promoter (Gentarget, San Diego, CA), were added to achieve a MOI of 20.  
146 Polybrene (8 $\mu$ g/ml) was added to each transduction reaction, supplied from the manufacturers, to  
147 aid with membrane charge. Cells were incubated at 39°C for 72 hours after which media was  
148 removed and replaced with fresh media containing 10% FBS. Transduction was confirmed using  
149 an EVOS 5000 (Invitrogen, Carlsbad, CA), equipped with GFP, RFP, DAPI and transmitted light  
150 cubes, to visualize cells expressing GFP or RFP, or both. Production of DF1 or MDCK cells  
151 expressing only human ACE2 (defined as ++) or only human TMPRSS2 (defined -+), or both  
152 (defined as ++), was confirmed by RT-PCR and purification by FACS cell sorting for either  
153 green or red fluorescence. For construction of cells expressing both, the human ACE2 was first  
154 inserted and purified for GFP (99% GFP-positive) followed by human TMPRSS2 insertion and  
155 cell sorting for both RFP- and GFP-positive cells (See Supplemental figure 1). Confirmation of  
156 human ACE2 and human TMPRSS2 expression was performed by RT-PCR and western blot.

157 **Construction of transgenic DF1 cell lines expressing different animal ACE2 and TMPRSS2**  
158 **genes using the PiggyBac transposon vector.** GenBank accession numbers used to construct all  
159 species plasmids can be found in Supplemental Table 1. The ACE2 and TMPRSS2 genes from  
160 cat (*Felis catus*), horse (*Equus ferus*), domestic pig (*Sus domesticus*), goat (*Capra aegagrus*),  
161 Golden hamster (*Mesocricetus auratus*), Little Brown bat (*Myotis lucifugus*) and Great  
162 Roundleaf bat (*Hipposideros armiger*) were *de novo* synthesized into the PiggyBac® transposon  
163 expression plasmids under control of the CMV promoter (VectorBuilder Inc., Chicago, IL). As  
164 with the human genes, GFP was included for ACE2 detection and purification, and RFP was  
165 included for TMPRSS2 detection and purification. Frozen *E. coli* plasmid glycerol stocks,  
166 containing either ACE2 or TMPRSS2, were streaked onto LB agar plates (Invitrogen) containing  
167 100  $\mu$ g/mL of Carbenicillin (Sigma). Plates were incubated overnight at 34°C in an



168 incubator/shaker (Amerex Instruments, Concord, CA). Single colonies were selected and  
169 incubated in 50 mL LB Broth, containing 100 µg/mL of Carbenicillin, with gentle agitation  
170 overnight in an incubator/shaker at 34°C (Amerex Instruments).

171 **Plasmid DNA Isolation.** *E. coli* plasmid colonies, from overnight LB broth culture, were  
172 pelleted, by centrifugation at 4,000 x g for 10 minutes at room temperature in a tabletop  
173 centrifuge (Beckman Coulter, Pasadena, CA). Plasmid DNA was isolated from each cell pellet  
174 using the Purelink®HiPure Plasmid Maxiprep DNA Purification Kit (Invitrogen) according to  
175 manufacturer's instructions. Purified DNA was eluted in 50 µl TE buffer. DNA was quantified  
176 using the DeNovix DS-11FX spectrophotometer/fluorometer with a Qubit™ dsDNA HS Assay  
177 Kit (Invitrogen), and stored at -20°C.

178 **PiggyBac Transfection with animal ACE2 or TMPRSS2.** DF1 cells were seeded, at a density  
179 of  $0.5 \times 10^5$  in 500 µl DMEM, containing 10% Fetal Bovine Serum (FBS) and 1%  
180 Antimicrobial-Antimycotic, in one well of a 12 well plate. Cells were incubated overnight at  
181 39°C to reach 75-90% confluence. Once cells reached desired confluence, the media was  
182 removed, and cells were washed twice with DMEM. Cells were transfected using Lipofectamine  
183 3000 (Invitrogen) according to the manufacturer's protocol. Transposase and Transposon DNA  
184 were added at 1:1 ratio in 10% FBS. Cells were incubated for 72 hours at 39°C, after which  
185 expression was confirmed using an EVOS 5000 as above.

186 **Fluorescent-activation cell sorting (FACS).** Transgenic cells expressing ACE2, TMPRSS2 or  
187 both, were grown to 90% confluence in T125 flasks. Adherent cells were trypsinized and  
188 pelleted by centrifugation at 1500 x g for 10 minutes at room temperature. Cell pellet was  
189 resuspended in phenol red free DMEM (GIBCO) containing 20% FBS, and 1% Antimicrobial-

190 Antimycotic. The cell suspension was then strained through a 50µm cell strainer (Fisher  
191 Scientific). Cells were sorted for GFP or RFP, or both, at the University of Georgia (Athens,  
192 Georgia), Flow Cytometry Core Center, using a Beckman Coulter Moflo Astrios EQ (Beckman  
193 Coulter).

194 **RNA extraction and RT-PCR for human ACE2 and TMPRSS2.** Total RNA was extracted  
195 from  $2.5 \times 10^5$  cells in one well of a 6 well plate from Vero, DF1, DF1 +-, DF1 -+, DF1 ++,  
196 MDCK, MDCK +-, MDCK -+ and MDCK ++. Once cells were 75% confluent, media was  
197 removed and 500 µl of Trizol Reagent (Invitrogen) was added to the wells then placed into 1.5  
198 mL microcentrifuge tubes. Tubes were centrifuged at 10,000 x g for ten minutes at 4°C to  
199 remove any solids. One hundred µl of chloroform (Sigma) was added to supernatant, mixed by  
200 rapid inversion for 30 seconds, allowed to sit for 3 minutes, and centrifuged at 10,000 x g for 15  
201 minutes at 4°C. The aqueous phase was then removed and added to an equal amount of 100%  
202 Ethanol (Sigma). Final RNA extraction was carried out using the ZYMO Direct-zol Mini-Prep  
203 Plus Kit (Zymo Research, Irvine, CA) per manufactures instructions.

204 Superscript 4 Reverse Transcriptase (Invitrogen) was used according to manufacturer's  
205 instructions. One µl of 2 µM gene specific primer and 11 µl of RNA were used for all reactions.  
206 Gene specific first strand primers used were: human ACE2 5' GGA TCC TAA AAG GAG GTC  
207 TGA ACA TCA TCA 3' and human TMPRSS2 5' GAA TCG ACG TTC CCC TGC AG 3'.  
208 Two µl of cDNA template was used for all cell lines. Reactions were conducted using NEB  
209 Phusion Hi Fi Polymerase (New England Biolabs, Ipswich, MA). Reactions were comprised of 4  
210 µl 5X Phusion Buffer, 0.4 µl 10 mM DNTPs, 1 µl of Forward and Reverse Primer, 2 µl of  
211 cDNA, 0.6 µl of DMSO, 0.2µl of DNA polymerase, and 11 µl of ultrapure water (Invitrogen).

212 Primers used for human ACE2 PCR were Forward 5' CTA GCT GTC AAG CTCTTC CTG  
213 GCT C 3' and Reverse 5' GGA TCC TAA AAG GAG GTC TGA ACA TCA TCA 3'. Reaction  
214 conditions were 98°C for thirty seconds, followed by 35 cycles of 98° for ten seconds, 68°C for  
215 thirty seconds and 72°C for one minute, after which a final extension of ten minutes at 72° was  
216 added.

217 Primers for human TMPRSS2 were Forward 5' GGA AAA CCC CTA TCC CGC AC3' and  
218 Reverse 5' GAA TCG ACG TTC CCC TGC AG 3'. Annealing temperature for reactions was  
219 66°C and all other conditions were identical to human ACE2. PCR products were visualized on  
220 1% agarose gel (Bio-Rad Laboratories, Hercules, CA) containing SYBR Safe (Invitrogen) using  
221 a documentation system (Syngene International Ltd, Bengaluru, India).

222 **RNA extraction and RT-PCR for animal species ACE2 and TMPRSS2.** Total RNA was  
223 extracted as above. Superscript 4 Reverse Transcriptase (Invitrogen) was used according to  
224 manufacturer's instructions. One µl of 2 µm gene specific primer and 11 µl of RNA were used  
225 for all reactions. Gene specific first strand primers used were: universal (except chicken) ACE2  
226 5' TCC AAG AGC TGA TTT TAG GCT TAT CC 3' and universal (except bat and chicken)  
227 TMPRSS2 5' CTG TTT GCC CTC ATT TGT CGA TA3 '. Bat TMPRSS2 first strand primers  
228 were: 5' CAA AGT GAC CAG AGG ACC G 3'. Chicken ACE2 first strand primer 5'AGC  
229 CAA TGG ATC TGC CAG AA 3' and chicken TMPRSS2 first strand primers 5' TCT GCC  
230 AGG CCA CAA GTA GG 3'. Two µl of cDNA template was used for all cell lines. Reactions  
231 were conducted using NEB Phusion Hi Fi Polymerase (New England Biolabs, Ipswich, MA).  
232 Reactions were comprised of 4 µl 5X Phusion Buffer, 0.4 µl 10 mM DNTPs, 1 µl of Forward  
233 and Reverse Primer, 2 µl of cDNA, 0.6 µl of DMSO, 0.2µl of DNA polymerase, and 11 µl of

234 ultrapure water (Invitrogen). Primers used for animal (except chicken) ACE2 PCR were  
235 Forward 5' CTC TTT CTG GCT CCT TCT CAG CTT 3' and Reverse 5' TCC AAG AGC TGA  
236 TTT TAG GCT TAT CC 3'. Chicken ACE2 primers were Forward 5' ACG CTA GCC GCT  
237 TCT CAC TAG C 3' and Reverse 5' AGC CAA TGG ATC TGC CAG AA 3'. Reaction  
238 conditions were 98°C for thirty seconds, followed by 35 cycles of 98° for ten seconds, 68°C for  
239 thirty seconds and 72°C for one minute, after which a final extension of ten minutes at 72° was  
240 added.

241 Universal primers for animal TMPRSS2 (except bat and chicken) were Forward 5' ATG GCT  
242 TTG AAC TCA GGG TC 3' and Reverse 5' CTG TTT GCC CTC ATT TGT CGA TA 3'. Bat  
243 TMPRSS2 primers were Forward 5' CAG GGA TTT TGA GAC AAT CTT TCA T 3' and  
244 Reverse 5' CAA AGT GAC CAG AGG ACC G 3'. Chicken specific TMPRSS2 primers were  
245 Forward 5' TGT TAC CAG AGG ACC TCC GC 3' and Reverse 5' TCT GCC AGG CCA CAA  
246 GTA GG 3'. Annealing temperature for reactions was 66°C and all other conditions were  
247 identical to animal ACE2. PCR products were visualized on 1% agarose gel (Bio-Rad  
248 Laboratories, Hercules, CA) containing SYBR Safe (Invitrogen) using a documentation system  
249 (Syngene International Ltd, Bengaluru, India). All primers used in these studies are listed in  
250 Supplemental Table 2.

251 **Detection of human ACE2 and TMPRSS2 protein expression by western blot, and**  
252 **immunohistochemistry to detect SC2.** Total cellular protein was extracted from cells seeded  
253 into one well of a six well plate in 10% FBS as above. Once cells reached 75% confluence media  
254 was removed and cells were washed twice with 1X PBS. One hundred µl of 2X Laemmli buffer,  
255 containing 2-mercaptoethanol, was added to the cells and collected into 1.5 ml microcentrifuge

256 tubes. The cells were then boiled for 7 minutes and vortexed. Fifteen  $\mu\text{g}$  of each protein sample  
257 and 5  $\mu\text{l}$  of Page Ruler Plus (Invitrogen) was loaded onto a Bio Rad Mini-Protean Precast TGX  
258 gel and separated for one hour at 100 Volts. The separated proteins were transferred to a 0.2  $\mu\text{M}$   
259 nitrocellulose membrane (Bio Rad) at 100V for 1 hour as previously described (30). Unbound  
260 proteins binding sites were blocked with 3% non-fat milk in 1X PBS for 1 hour at room  
261 temperature with gentle rocking. The blot was washed 3 times, for five minutes, with 1 X Tris  
262 Buffered Saline (TBS), pH 7.4, containing 0.05% tween-20 (TBST). The blot was then incubated  
263 overnight at 4°C in primary antibody diluted 1:1500 in TBS. Primary monoclonal antibodies  
264 included mouse anti-human ACE2 (Origen), rabbit anti-human TMPRSS2 (Abcam, Cambridge,  
265 UK) and mouse anti-beta actin (Invitrogen). The blot was washed as before, incubated for 1  
266 hour, at room temperature, in secondary antibody diluted 1:20,000 in TBS with gentle rocking.  
267 Secondary antibodies included rat anti-mouse IgG1 HRP (Southern Biotech, Birmingham, AL),  
268 and mouse anti-rabbit IgG1 HRP (Southern Biotech). After incubation, the blot was washed 3  
269 times as above in TBST. Pierce ECL substrate (Fisher) was added to the blot for 1 minute and  
270 excess was removed by gentle wicking. The blot was placed into an x-ray cassette and exposed  
271 to x-ray film (Fisher) for 1 minute, developed and fixed (Kodak).

272 For immunohistochemistry of SC2 replication, cells were seeded into an I-Bidi 8-well  
273 chambered slide (Fisher) at a density of  $4 \times 10^4$  in 500  $\mu\text{l}$  DMEM containing 10% FBS and  
274 grown overnight as above. When cells reached 75% confluence the media was removed, and  
275 virus was added at MOI of 1 as above. After 48 hours, the media was removed and cells were  
276 fixed for 5 minutes at 4C in 1:1 ice cold ethanol:methanol. Cells were then washed twice with  
277 cold PBS as above. Cells were blocked as above for one hour at room temperature then washed 3  
278 time with TBS. Primary antibodies against SC2 included rabbit anti-Nucleoprotein MAb

279 (Origene) and rabbit anti-Spike MAb (Origene), diluted as above, were added for 1 hour at room  
280 temperature. Cells were washed 3 times with PBS and incubated in the secondary antibody, goat  
281 anti-rabbit IgG H&L (Alexa Fluor<sup>®</sup> 555) (ABCAM) diluted 1:20,000 in TBS, for one hour at  
282 room temperature. Cells were then washed 3 times with PBS and counterstained with DAPI  
283 (Invitrogen) for 5 minutes. Cells were washed 3 times with PBS then allowed to air dry. Once  
284 dry, cells were mounted with ProLong<sup>™</sup> Gold Antifade Mountant (Fisher) and sealed with glass  
285 coverslips after 24 hours. Immunofluorescence was visualized with an EVOS 5000 (Invitrogen).

286 **Comparison of SARS-CoV-2 replication dynamics among cell lines.** Cell lines were tested for  
287 virus replication by inoculating them with SC2 at an MOI of 1 added directly when cells were  
288 approximately 70-90% confluent in 6 well plates. For each cell line, media was removed from  
289 three wells and 0.4 ml of virus was added. The same volume of sterile medium was added to  
290 wells on each plate to serve as a sham inoculated control. The plates were incubated for 1 hr at  
291 37°C, 5% CO<sub>2</sub> to allow virus to adsorb to the cells. Each well was washed 3-times with sterile  
292 PBS prewarmed at 37°C to remove unbound virus. Finally, 3 ml growth medium was added to  
293 each well and the cells were incubated at 37°C with 5% CO<sub>2</sub>. Supernatant (0.2mL) was collected  
294 from each well individually at 6, 12, 24, 36, 48 and 72 hours post inoculation (hpi) for detection  
295 of replicating virus by RT-PCR, and detection of cytopathic effect. After 72 hpi, plates were  
296 frozen and thawed at -80C (3x total) and 400 ul of cell culture supernatant was transferred onto  
297 fresh cell cultures as above for a pass 2.

298 **Quantitative real-time RT-PCR to detect SARS-CoV-2.** Quantitative RT-PCR was utilized to  
299 detect and determine virus titers in cell culture supernatants. RNA was extracted with the  
300 Ambion Magmax kit (ThermoFisher). The US Centers for Disease Control N1 primers and probe

301 for SARS-CoV-2 were used with the AgPath ID one-step RT-PCR kit (31). The cycling  
302 conditions for the RT step were modified to accommodate the recommended kit conditions. A  
303 standard curve of RNA from titrated SARS-CoV-2 virus stock was run in duplicate to establish  
304 titer equivalents of virus.

305 **TMPRSS2 genetic analysis.** TMPRSS2 gene sequences from animal species were obtained  
306 from GenBank. Sequences were aligned with Clustal V (Lasergene 10.0, DNASTar, Madison,  
307 WI), and protein architecture derived from The National Center for Biotechnology  
308 ([www.ncbi.nih.gov](http://www.ncbi.nih.gov)).

309 **Statistical analysis.** Viral titers at 48 hpi were compared with the two-way ANOVA with Tukey  
310 multiple comparison (Prism 9.1.0 GraphPad Software, San Diego, CA). Different lower case  
311 letters indicate statistical significance between compared groups. All statistical tests used  $P <$   
312 0.05 as being statistically significant.

## 313 **RESULTS**

314 **Development of DF1 and MDCK cell lines expressing human ACE2 and TMPRSS2.** These  
315 studies were designed to transgenically introduce the human receptor and protease used by SC2  
316 into the avian non-permissive cell line, DF1, and MDCK, to test requirements for replication  
317 competence and establish a model for infection potential. A lentivirus approach was used to  
318 deliver the human ACE2 and human TMPRSS2 genes, under control of the CMV promoter. The  
319 lentivirus constructs co-expressed GFP (ACE2) and/or RFP (TMPRSS2) to allow FACS sorting  
320 for purification of cells containing each target gene or both genes (Supplemental Figure 1A, B,  
321 C). Positive DF1 and MDCK cells were demonstrated expressing either the human ACE2 gene  
322 or human TMPRSS2 gene alone, or both, based on microscopy and two-color cell sorting (Figure

323 1, Supplemental Figure 2). Detection of the inserted genes was confirmed with RT-PCR using  
324 primers specific for the human and chicken genes (Figure 2A and B). Expression of human  
325 ACE2 and human TMPRSS2 protein in DF1 ++ and MDCK ++ cells was confirmed via western  
326 blot (Figure 2C).

327

328 **Comparison of SARS-CoV-2 replication dynamics in DF1 and MDCK cell lines expressing**  
329 **human ACE2 and/or TMPRSS2.** Growth curves for all three cell lines (Vero, DF1, and  
330 MDCK) expressing only human ACE2 (+-), only human TMPRSS2 (-+), or both (++) are shown  
331 in Figure 3. No increase in virus titer was demonstrated in wild type DF1 or MDCK, or the DF1  
332 and MDCK cells expressing single gene constructs with human ACE2 or human TMPRSS2  
333 (Figure 3A). In contrast, virus replication was observed in Vero (positive control), and the  
334 DF1++ and MDCK ++ cells. Virus growth was exponential until approximately 36 hours post  
335 infection and was statistically higher in these cells than others tested. Virus titers reached similar  
336 levels of approximately  $10^{5.6}$  TCID<sub>50</sub> in these three cell lines, and demonstrated a requirement for  
337 expression of both the receptor and the protease. We next passaged the 72 hour sample from  
338 each cell line after a freeze thaw cycle onto a subsequent plate of the same cells (Figure 3B). No  
339 evidence of increased replication was seen in cell lines that did not demonstrate signs of virus  
340 replication during the first passage. In contrast, the Vero, DF1++, and MDCK ++ passage 1  
341 samples contained enough virus to induce infection and replication on passage 2, although the  
342 growth curves displayed a more linear increase in virus titer over time compared to passage 1  
343 inoculated cells.

344



345 **Comparison of cytopathic effects and detection of virus in cell lines expressing human**

346 **ACE2 and TMPRSS2.** The appearance of CPE and confirmation of virus protein inside of the  
347 cell lines was performed via light microscopy and immunohistochemistry with antibodies against  
348 the SC2 spike and nucleoprotein. Neither CPE nor virus could be detected in cells without virus  
349 (Figure 4) or in the DF1 and MDCK inoculated cells. Likewise, cell lines containing the singular  
350 insertion of either the human ACE2 or TMPRSS2 did not exhibit CPE or positive viral staining  
351 (data not shown). Vero, DF1++, and MDCK++ demonstrated syncytia formation with loss of cell  
352 confluence. The monolayer also deteriorated by 72 hpi and CPE correlated with detection of high  
353 levels of expression of the viral spike and nucleoprotein by immunostaining at 48 hpi.

354

355 **Development of cell lines expressing ACE2 and TMPRSS2 from different animal species.**

356 Having demonstrated a model of virus replication in the non-permissive avian DF1 cell line with  
357 insertion of the human ACE2 and TMPRSS2 genes, we next developed cells lines expressing  
358 other species ACE2 and TMPRSS2 to screen for potential animal hosts that could support  
359 replication. The ACE2 and TMPRSS2 genes from house cat, goat, golden hamster, horse, pig,  
360 Little Brown bat, and Great Roundleaf bat were *de novo* constructed in the PiggyBac transposon  
361 system and transfected into DF1 cells. Purification of cells with green/red fluorescence was used  
362 as with the lentivirus system. As demonstrated in Figure 5, RT-PCR confirmed expression of  
363 animal ACE2 and TMPRSS2 in DF1 cells from FACS-sorted cells.

364

365 **SARS-CoV-2 replication in cells expressing animal ACE2 or TMPRSS2.**

366 The replication kinetics of SC2 virus in DF1 cell lines expressing the ACE2 and TMPRSS2  
367 genes from the different animal species was determined. Results demonstrate that the SC2 virus

368 could replicate to high levels in DF1 cell lines expressing the ACE2 and TMPRSS2 genes from  
369 cat, goat and golden hamster (Figure 6A). Virus titers reached similar levels of approximately  
370  $10^{5.1}$  to  $10^{5.8}$  TCID<sub>50</sub> at 36 hours post infection in these lines, which was similar to that observed  
371 in the Vero control cells. No virus replication was observed in the cells expressing the receptor  
372 and protease from pig or horse species. Both bat species demonstrated initial gains in virus titers,  
373 between  $10^{3.3}$  and  $10^{3.9}$  TCID<sub>50</sub> at 12 hours post infection that did not increase after this time. The  
374 72 hpi sample from all cell lines were passaged onto a subsequent plate of cells. Passage 2 results  
375 indicate viral infection and replication from plates containing the cat, goat and golden hamster  
376 animal cell lines (Figure 6B). As observed previously, a linear shaped curve in virus replication  
377 was observed in passage 2. Neither the pig nor the horse cell lines had evidence of virus  
378 replication in passage 2. The samples from the two bat species cell lines also had no evidence of  
379 replication on passage 2.

380

381 Sequence analysis of available TMPRSS2 sequence data for human and animal species  
382 demonstrated a truncation at the 5' end of the bat protein compared to human or other animals  
383 (Supplemental Figure 3). The human protein has 492 amino acids (AA), whereas the Little  
384 Brown bat contains 243 AA and Great Roundleaf bat has 384 AA. It is not clear if the bat  
385 sequences available in GenBank were incorrectly annotated and are not representative of the  
386 complete protein, and that the bat species TMPRSS2 tested here may not be functional due to the  
387 missing the N-terminal portion of the protein. The Little Brown bat open reading frame begins at  
388 human amino acid position 255, and the Great Roundleaf bat begins at human position 113.  
389 Interestingly, Brandts bat (*Myotis brandtii*) contained a protease similar to human and other  
390 animals.

391

392 **Comparison of cytopathic effects and detection of virus in cell lines expressing animal**

393 **ACE2 and TMPRSS2.** As before, detection of virus was observed via CPE and immunostaining

394 of transgenic cell lines. As demonstrated in Figure 7, we detected cytopathic effects in cell lines

395 that supported growth of the virus, including the ones expressing the cat, goat and golden

396 hamster genes. We also observed CPE in both the cell lines expressing the bat genes which

397 appeared more rapidly in the Great Roundleaf bat cell line compared to the Little Brown bat cell

398 line. Staining for viral proteins was greatest in cells expressing cat, goat or golden hamster

399 transgenes. Interestingly, we did observe positive staining in the bat species cells, however, it

400 was visibly reduced compared to the other positive cell lines. We did not observe either CPE or

401 viral staining in the cell lines expressing pig and horse genes.

402

403

## DISCUSSION

404 Several cell lines and organoids are currently in use or have been developed to study

405 SC2 replication. Besides Vero cells, Caco-2, Calu-2, and Hek293T cells, human lung, kidney,

406 liver and blood vessel organoids have been demonstrated to be permissive for virus growth (37-

407 45). However, because these systems can naturally be infected, they are not useful for testing

408 host susceptibility to the virus. Previous research done in our laboratory and by others clearly

409 demonstrate that poultry and other bird species cannot support replication of the virus (27, 46,

410 47). We hypothesized that avian cell lines could become permissible to infection if they

411 expressed a suitable ACE2 receptor and produced high enough levels of a protease that could

412 activate SC-2. It is worth mentioning that proteolytic cleavage of the S protein at the S1/S2

413 interface was assumed to be provided by furin-like enzymes naturally present in the DF1 or  
414 MDCK cell lines.

415         The SC2 utilizes the ACE2 protein as the primary receptor for entry into host cells and  
416 the TMPRSS2 protease has been shown to be critical for cleavage/activation of the spike protein  
417 (32, 33). In these studies, the transgenic insertion of the human ACE2 and TMPRSS2 genes  
418 conferred virus attachment and replication ability in the non-permissive avian DF1 cell lines and  
419 MDCK cell lines. The results also demonstrated that single expression of either the human  
420 receptor or the protease was not sufficient to allow for virus replication in these cell lines, either  
421 through a lack of attachment or spike protein activation. These studies also demonstrate DF1  
422 cells expressing the ACE2 and TMPRSS2 genes from different animal species can be used as an  
423 *in vitro* predictive model for virus replication. Wild type DF1 cells are normally incapable of  
424 supporting SC2 replication; however, expression of the receptor and protease genes from human,  
425 cat, goat and golden hamster allowed virus replication. This *in vitro* model correlates with the  
426 known natural or experimental susceptibility of three of these species and supports its use as a  
427 predictive model. The surprising result is the potential susceptibility of goats. Goats have not  
428 been known to be naturally or experimentally infected at this time, but one study has previously  
429 suggested that SC2 can infect HEK cells that are expressing goat ACE2 (53).

430         Multiple studies have looked at experimental inoculation in pigs, swine cell lines, and in  
431 cell lines where the swine ACE2 gene has been expressed with mixed results. Three different  
432 experimental challenge studies with swine were conducted with 2 studies showing no infection  
433 and a third showing only a small number of pigs infected after challenge (46, 47, 50-52). Two  
434 swine cell lines, swine testicular and porcine kidney cells, were also found to develop CPE after  
435 several passages of virus. Multiple studies have also used different mammalian cell lines and

436 transfected them with the swine ACE2 gene to allow for transient expression of the gene, and  
437 most found that SC2 or a SC2 pseudovirus could attach to and express protein in the cell as  
438 measured by several different methods (2, 4, 44, 53). This predictive data based on ACE2 data  
439 from some species, such as swine, suggest susceptibility to infection, although our results in DF1  
440 cells did not show evidence of virus replication. One possible explanation for the discrepancy in  
441 animal studies and *in vitro* studies is that the ACE2 protein in swine is not efficiently expressed  
442 in the respiratory tract, which is the most likely route of exposure, and the virus cannot  
443 efficiently attach and infect the exposed pig (54). Although results in swine are discordant, our  
444 studies using an avian cell line correlates closer with the swine challenge studies as we did not  
445 measure any virus in the cell supernatant that would be evidence of the virus completing the  
446 replication cycle, despite the possibility that the virus could attach to the modified cell line based  
447 on these previous studies.

448         The results with the horse ACE2 and TMPRSS2 genes showed no evidence of infection  
449 despite the relatively high sequence conservation of the horse ACE2 protein to human ACE2 at  
450 over 86%, which is higher than cats and Golden hamsters. Although the sequence similarity of  
451 human and horse ACE2 is high, the difficulty in challenging horses in a Biosafety level 3 animal  
452 facility has likely prevented the research from being performed. Our results provide additional  
453 support that horses are not susceptible to infection and do not need to be experimentally  
454 challenged.

455         Bats have been identified as likely reservoirs of both SARS-CoV-1 and MERS-CoV to  
456 humans through intermediate hosts including civet cats and dromedary camels, respectively (34-  
457 36). The SC2 virus appears capable to bind to Little Brown bat and Great Roundleaf Bat ACE2  
458 as observed by positive immunostaining and transient virus replication. However, the TMPRSS2

459 protease found in these species may not be functional as it lacks the 5' terminus found in human  
460 and other animals, including other bat species. Analysis of the GenBank record suggests that  
461 only partial sequence is available and that the gene was not properly annotated and thus the gene  
462 sequences used in these studies may not represent the true open reading frame. Further research  
463 is required to determine whether the anomaly is a sequence artifact. However, at least one report  
464 predicts low level fusion from Little Brown bat ACE2 compared to human ACE2, similar to the  
465 results described here (2). Further research is also underway to determine the contribution of  
466 different bat species ACE2 and TMPRSS2 as a barrier to SC2 infection.

467         As noted, SC2 appears to have a broad host range among mammals, however the full host  
468 range is unknown. Predictive *in silico* studies based on ACE2 analysis have described potential  
469 broad host tropism of the virus to numerous species including cat, goat and hamster (1, 2, 48,  
470 49). These studies also predict many aquatic species including whales and dolphins to have high  
471 likelihood of binding to SC2 spike protein. *In silico* analysis of the TMPRSS2 protein is less  
472 predictive, but the protease activation of the SC2 spike protein is necessary for replication to  
473 occur. As noted earlier, proteases other than TMPRSS2 have been demonstrated to have the  
474 ability to cleave the spike protein. *In vivo* testing of many large domestic animals and wild  
475 animal species would be difficult, if not impossible, because of the requirement for work in a  
476 secure biocontainment facility. Therefore we propose this model could be utilized to screen  
477 many species for susceptibility to SC2 infection. Understanding the host range of SC2 is crucial  
478 to understanding the ecology of the virus and the role different species may play as reservoirs or  
479 bridge-species into humans. Species that can be infected also may be affected by disease. Our *in*  
480 *vitro* testing in DF1 ++ cells positively correlated with available *in vivo* challenge data. Taken  
481 together, the integration and expression of the ACE2 and TMPRSS2 from a target species in the

482 otherwise non-permissive avian cell line provides a rapid and economical method to screen  
483 species for susceptibility to SC2.

484

#### 485 **Acknowledgements**

486 We thank Linda Moon, Scott Lee, Suzanne DeBlois, and Tim Olivier for excellent technical  
487 assistance. This research was supported by funding from USDA, ARS, CRIS project #6040-  
488 32000-066-00D.

489         The following reagent was deposited by the Centers for Disease Control and Prevention  
490 and obtained through BEI Resources, NIAID, NIH: SARS-Related Coronavirus 2, Isolate USA-  
491 WA1/2020, NR-52281. Vero African Green Monkey Kidney Cells (ATCC® CCL-81™), FR-  
492 243, was obtained through the International Reagent Resource, Influenza Division, WHO  
493 Collaborating Center for Surveillance, Epidemiology and Control of Influenza, Centers for  
494 Disease Control and Prevention, Atlanta, GA, USA.

495

496

497 **References**

- 498 1. Damas J, Hughes GM, Keough KC, Painter CA, Persky NS, Corbo M, Hiller M, Koepfli  
499 KP, Pfenning AR, Zhao H, Genereux DP, Swofford R, Pollard KS, Ryder OA, Nweeia  
500 MT, Lindblad-Toh K, Teeling EC, Karlsson EK, Lewin HA. 2020. Broad host range of  
501 SARS-CoV-2 predicted by comparative and structural analysis of ACE2 in vertebrates.  
502 Proc Natl Acad Sci U S A 117:22311-22322.  
503
- 504 2. Conceicao C, Thakur N, Human S, Kelly JT, Logan L, Bialy D, Bhat S, Stevenson-  
505 Leggett P, Zagrajek AK, Hollinghurst P, Varga M, Tsirigoti C, Tully M, Chiu C, Moffat  
506 K, Silesian AP, Hammond JA, Maier HJ, Bickerton E, Shelton H, Dietrich I, Graham SC,  
507 Bailey D. 2020. The SARS-CoV-2 Spike protein has a broad tropism for mammalian  
508 ACE2 proteins. PLoS Biol 18:e3001016.  
509
- 510 3. Ksiazek TG, Erdman D, Goldsmith CS, Zaki SR, Peret T, Emery S, Tong S, Urbani C,  
511 Comer JA, Lim W, Rollin PE, Dowell SF, Ling AE, Humphrey CD, Shieh WJ, Guarner  
512 J, Paddock CD, Rota P, Fields B, DeRisi J, Yang JY, Cox N, Hughes JM, LeDuc JW,  
513 Bellini WJ, Anderson LJ, Group SW. 2003. A novel coronavirus associated with severe  
514 acute respiratory syndrome. N Engl J Med 348:1953-66.  
515
- 516 4. Li Z, Tomlinson AC, Wong AH, Zhou D, Desforges M, Talbot PJ, Benlekbir S,  
517 Rubinstein JL, Rini JM. 2019. The human coronavirus HCoV-229E S-protein structure  
518 and receptor binding. Elife 8.  
519



- 520 5. Brian DA, Baric RS. 2005. Coronavirus genome structure and replication. *Curr Top*  
521 *Microbiol Immunol* 287:1-30.  
522
- 523 6. Cui J, Li F, Shi ZL. 2019. Origin and evolution of pathogenic coronaviruses. *Nat Rev*  
524 *Microbiol* 17:181-192.  
525
- 526 7. Lin SY, Li YT, Chen YT, Chen TC, Hu CJ, Chen HW. 2016. Identification of an  
527 infectious bronchitis coronavirus strain exhibiting a classical genotype but altered  
528 antigenicity, pathogenicity, and innate immunity profile. *Sci Rep* 6:37725.  
529
- 530 8. Zhou P, Fan H, Lan T, Yang XL, Shi WF, Zhang W, Zhu Y, Zhang YW, Xie QM, Mani  
531 S, Zheng XS, Li B, Li JM, Guo H, Pei GQ, An XP, Chen JW, Zhou L, Mai KJ, Wu ZX,  
532 Li D, Anderson DE, Zhang LB, Li SY, Mi ZQ, He TT, Cong F, Guo PJ, Huang R, Luo  
533 Y, Liu XL, Chen J, Huang Y, Sun Q, Zhang XL, Wang YY, Xing SZ, Chen YS, Sun Y,  
534 Li J, Daszak P, Wang LF, Shi ZL, Tong YG, Ma JY. 2018. Fatal swine acute diarrhoea  
535 syndrome caused by an HKU2-related coronavirus of bat origin. *Nature* 556:255-258.  
536
- 537 9. Cavanagh D. 2007. Coronavirus avian infectious bronchitis virus. *Vet Res* 38:281-97.  
538
- 539 10. Forni D, Cagliani R, Clerici M, Sironi M. 2017. Molecular Evolution of Human  
540 Coronavirus Genomes. *Trends Microbiol* 25:35-48.  
541

- 542 11. Han HJ, Wen HL, Zhou CM, Chen FF, Luo LM, Liu JW, Yu XJ. 2015. Bats as reservoirs  
543 of severe emerging infectious diseases. *Virus Res* 205:1-6.  
544
- 545 12. Song HD, Tu CC, Zhang GW, Wang SY, Zheng K, Lei LC, Chen QX, Gao YW, Zhou  
546 HQ, Xiang H, Zheng HJ, Chern SW, Cheng F, Pan CM, Xuan H, Chen SJ, Luo HM,  
547 Zhou DH, Liu YF, He JF, Qin PZ, Li LH, Ren YQ, Liang WJ, Yu YD, Anderson L,  
548 Wang M, Xu RH, Wu XW, Zheng HY, Chen JD, Liang G, Gao Y, Liao M, Fang L, Jiang  
549 LY, Li H, Chen F, Di B, He LJ, Lin JY, Tong S, Kong X, Du L, Hao P, Tang H, Bernini  
550 A, Yu XJ, Spiga O, Guo ZM, et al. 2005. Cross-host evolution of severe acute respiratory  
551 syndrome coronavirus in palm civet and human. *Proc Natl Acad Sci U S A* 102:2430-5.  
552
- 553 13. Muller MA, Corman VM, Jores J, Meyer B, Younan M, Liljander A, Bosch BJ, Lattwein  
554 E, Hilali M, Musa BE, Bornstein S, Drosten C. 2014. MERS coronavirus neutralizing  
555 antibodies in camels, Eastern Africa, 1983-1997. *Emerg Infect Dis* 20:2093-5.  
556
- 557 14. Hoffmann M, Kleine-Weber H, Schroeder S, Kruger N, Herrler T, Erichsen S, Schiergens  
558 TS, Herrler G, Wu NH, Nitsche A, Muller MA, Drosten C, Pohlmann S. 2020. SARS-  
559 CoV-2 Cell Entry Depends on ACE2 and TMPRSS2 and Is Blocked by a Clinically  
560 Proven Protease Inhibitor. *Cell* 181:271-280 e8.  
561
- 562 15. Hulswit RJ, de Haan CA, Bosch BJ. 2016. Coronavirus Spike Protein and Tropism  
563 Changes. *Adv Virus Res* 96:29-57.  
564

- 565 16. Hoffmann M, Kleine-Weber H, Pohlmann S. 2020. A Multibasic Cleavage Site in the  
566 Spike Protein of SARS-CoV-2 Is Essential for Infection of Human Lung Cells. *Mol Cell*  
567 78:779-784 e5.  
568
- 569 17. Glowacka I, Bertram S, Muller MA, Allen P, Soilleux E, Pfefferle S, Steffen I, Tsegaye  
570 TS, He Y, Gnirss K, Niemeyer D, Schneider H, Drosten C, Pohlmann S. 2011. Evidence  
571 that TMPRSS2 activates the severe acute respiratory syndrome coronavirus spike protein  
572 for membrane fusion and reduces viral control by the humoral immune response. *J Virol*  
573 85:4122-34.  
574
- 575 18. Matsuyama S, Nagata N, Shirato K, Kawase M, Takeda M, Taguchi F. 2010. Efficient  
576 activation of the severe acute respiratory syndrome coronavirus spike protein by the  
577 transmembrane protease TMPRSS2. *J Virol* 84:12658-64.  
578
- 579 19. Shulla A, Heald-Sargent T, Subramanya G, Zhao J, Perlman S, Gallagher T. 2011. A  
580 transmembrane serine protease is linked to the severe acute respiratory syndrome  
581 coronavirus receptor and activates virus entry. *J Virol* 85:873-82.  
582
- 583 20. Heald-Sargent T, Gallagher T. 2012. Ready, set, fuse! The coronavirus spike protein and  
584 acquisition of fusion competence. *Viruses* 4:557-80.  
585
- 586 21. Millet JK, Whittaker GR. 2015. Host cell proteases: Critical determinants of coronavirus  
587 tropism and pathogenesis. *Virus Res* 202:120-34.

- 588
- 589 22. Bestle D, Heindl MR, Limburg H, Van Lam van T, Pilgram O, Moulton H, Stein DA,  
590 Hardes K, Eickmann M, Dolnik O, Rohde C, Klenk HD, Garten W, Steinmetzer T,  
591 Bottcher-Friebertshauser E. 2020. TMPRSS2 and furin are both essential for proteolytic  
592 activation of SARS-CoV-2 in human airway cells. *Life Sci Alliance* 3.
- 593
- 594 23. Zmora P, Hoffmann M, Kollmus H, Moldenhauer AS, Danov O, Braun A, Winkler M,  
595 Schughart K, Pohlmann S. 2018. TMPRSS11A activates the influenza A virus  
596 hemagglutinin and the MERS coronavirus spike protein and is insensitive against  
597 blockade by HAI-1. *J Biol Chem* 293:13863-13873.
- 598
- 599 24. Patel VB, Zhong JC, Grant MB, Oudit GY. 2016. Role of the ACE2/Angiotensin 1-7  
600 Axis of the Renin-Angiotensin System in Heart Failure. *Circ Res* 118:1313-26.
- 601
- 602 25. Feng Y, Yue X, Xia H, Bindom SM, Hickman PJ, Filipeanu CM, Wu G, Lazartigues E.  
603 2008. Angiotensin-converting enzyme 2 overexpression in the subfornical organ prevents  
604 the angiotensin II-mediated pressor and drinking responses and is associated with  
605 angiotensin II type 1 receptor downregulation. *Circ Res* 102:729-36.
- 606
- 607 26. Ghai RR, Carpenter A, Liew AY, Martin KB, Herring MK, Gerber SI, Hall AJ, Sleeman  
608 JM, VonDobschuetz S, Behravesh CB. 2021. Animal Reservoirs and Hosts for Emerging  
609 Alphacoronaviruses and Betacoronaviruses. *Emerg Infect Dis* 27:1015-1022.
- 610

- 611 27. Suarez DL, Pantin-Jackwood MJ, Swayne DE, Lee SA, DeBlois SM, Spackman E. 2020.  
612 Lack of Susceptibility to SARS-CoV-2 and MERS-CoV in Poultry. *Emerg Infect Dis*  
613 26:3074-3076.  
614
- 615 28. Liu Z, Zheng H, Lin H, Li M, Yuan R, Peng J, Xiong Q, Sun J, Li B, Wu J, Yi L, Peng  
616 X, Zhang H, Zhang W, Hulswit RJG, Loman N, Rambaut A, Ke C, Bowden TA, Pybus  
617 OG, Lu J. 2020. Identification of Common Deletions in the Spike Protein of Severe  
618 Acute Respiratory Syndrome Coronavirus 2. *J Virol* 94.  
619
- 620 29. Gralinski LE, Menachery VD. 2020. Return of the Coronavirus: 2019-nCoV. *Viruses* 12.  
621
- 622 30. Kapczynski DR, Tumpey TM, Hidajat R, Zsak A, Chrzastek K, Tretyakova I, Pushko P.  
623 2016. Vaccination with virus-like particles containing H5 antigens from three H5N1  
624 clades protects chickens from H5N1 and H5N8 influenza viruses. *Vaccine* 34:1575-1581.  
625
- 626 31. Lu X, Wang L, Sakthivel SK, Whitaker B, Murray J, Kamili S, Lynch B, Malapati L,  
627 Burke SA, Harcourt J, Tamin A, Thornburg NJ, Villanueva JM, Lindstrom S. 2020. US  
628 CDC Real-Time Reverse Transcription PCR Panel for Detection of Severe Acute  
629 Respiratory Syndrome Coronavirus 2. *Emerg Infect Dis* 26.  
630
- 631 32. Gallagher T, McCray PB, Jr. 2021. The first few days of a SARS-CoV-2 infection  
632 viewed at single-cell resolution. *PLoS Biol* 19:e3001217.  
633

- 634 33. Sasaki M, Uemura K, Sato A, Toba S, Sanaki T, Maenaka K, Hall WW, Orba Y, Sawa H.  
635 2021. SARS-CoV-2 variants with mutations at the S1/S2 cleavage site are generated in  
636 vitro during propagation in TMPRSS2-deficient cells. *PLoS Pathog* 17:e1009233.  
637
- 638 34. Corman VM, Eckerle I, Memish ZA, Liljander AM, Dijkman R, Jonsdottir H, Juma  
639 Ngeiywa KJ, Kamau E, Younan M, Al Masri M, Assiri A, Gluecks I, Musa BE, Meyer B,  
640 Muller MA, Hilali M, Bornstein S, Wernery U, Thiel V, Jores J, Drexler JF, Drosten C.  
641 2016. Link of a ubiquitous human coronavirus to dromedary camels. *Proc Natl Acad Sci*  
642 *U S A* 113:9864-9.  
643
- 644 35. Ye ZW, Yuan S, Yuen KS, Fung SY, Chan CP, Jin DY. 2020. Zoonotic origins of human  
645 coronaviruses. *Int J Biol Sci* 16:1686-1697.  
646
- 647 36. Zhou Z, Hui KPY, So RTY, Lv H, Perera R, Chu DKW, Gelaye E, Oyas H, Njagi O,  
648 Abayneh T, Kuria W, Walelign E, Wanglia R, El Masry I, Von Dobschuetz S,  
649 Kalpravidh W, Chevalier V, Miguel E, Fassi-Fihri O, Trarore A, Liang W, Wang Y,  
650 Nicholls JM, Zhao J, Chan MCW, Poon LLM, Mok CKP, Peiris M. 2021. Phenotypic  
651 and genetic characterization of MERS coronaviruses from Africa to understand their  
652 zoonotic potential. *Proc Natl Acad Sci U S A* 118.  
653
- 654 37. Zhou J, Li C, Liu X, Chiu MC, Zhao X, Wang D, Wei Y, Lee A, Zhang AJ, Chu H, Cai  
655 JP, Yip CC, Chan IH, Wong KK, Tsang OT, Chan KH, Chan JF, To KK, Chen H, Yuen

- 656 KY. 2020. Infection of bat and human intestinal organoids by SARS-CoV-2. *Nat Med*  
657 26:1077-1083.
- 658
- 659 38. Harcourt J, Tamin A, Lu X, Kamili S, Sakthivel SK, Murray J, Queen K, Tao Y, Paden  
660 CR, Zhang J, Li Y, Uehara A, Wang H, Goldsmith C, Bullock HA, Wang L, Whitaker B,  
661 Lynch B, Gautam R, Schindewolf C, Lokugamage KG, Scharton D, Plante JA,  
662 Mirchandani D, Widen SG, Narayanan K, Makino S, Ksiazek TG, Plante KS, Weaver  
663 SC, Lindstrom S, Tong S, Menachery VD, Thornburg NJ. 2020. Severe Acute  
664 Respiratory Syndrome Coronavirus 2 from Patient with Coronavirus Disease, United  
665 States. *Emerg Infect Dis* 26:1266-1273.
- 666
- 667 39. Ou X, Liu Y, Lei X, Li P, Mi D, Ren L, Guo L, Guo R, Chen T, Hu J, Xiang Z, Mu Z,  
668 Chen X, Chen J, Hu K, Jin Q, Wang J, Qian Z. 2020. Characterization of spike  
669 glycoprotein of SARS-CoV-2 on virus entry and its immune cross-reactivity with SARS-  
670 CoV. *Nat Commun* 11:1620.
- 671
- 672 40. Kim JM, Kim HM, Lee EJ, Jo HJ, Yoon Y, Lee NJ, Son J, Lee YJ, Kim MS, Lee YP,  
673 Chae SJ, Park KR, Cho SR, Park S, Kim SJ, Wang E, Woo S, Lim A, Park SJ, Jang J,  
674 Chung YS, Chin BS, Lee JS, Lim D, Han MG, Yoo CK. 2020. Detection and Isolation of  
675 SARS-CoV-2 in Serum, Urine, and Stool Specimens of COVID-19 Patients from the  
676 Republic of Korea. *Osong Public Health Res Perspect* 11:112-117.
- 677

- 678 41. Suzuki YJ, Nikolaienko SI, Dibrova VA, Dibrova YV, Vasylyk VM, Novikov MY,  
679 Shults NV, Gychka SG. 2021. SARS-CoV-2 spike protein-mediated cell signaling in lung  
680 vascular cells. *Vascul Pharmacol* 137:106823.
- 681
- 682 42. Han Y, Duan X, Yang L, Nilsson-Payant BE, Wang P, Duan F, Tang X, Yaron TM,  
683 Zhang T, Uhl S, Bram Y, Richardson C, Zhu J, Zhao Z, Redmond D, Houghton S,  
684 Nguyen DT, Xu D, Wang X, Jessurun J, Borczuk A, Huang Y, Johnson JL, Liu Y, Xiang  
685 J, Wang H, Cantley LC, tenOever BR, Ho DD, Pan FC, Evans T, Chen HJ, Schwartz RE,  
686 Chen S. 2021. Identification of SARS-CoV-2 inhibitors using lung and colonic  
687 organoids. *Nature* 589:270-275.
- 688
- 689 43. Monteil V, Kwon H, Prado P, Hagelkruys A, Wimmer RA, Stahl M, Leopoldi A, Garreta  
690 E, Hurtado Del Pozo C, Prosper F, Romero JP, Wirnsberger G, Zhang H, Slutsky AS,  
691 Conder R, Montserrat N, Mirazimi A, Penninger JM. 2020. Inhibition of SARS-CoV-2  
692 Infections in Engineered Human Tissues Using Clinical-Grade Soluble Human ACE2.  
693 *Cell* 181:905-913 e7.
- 694
- 695 44. Zhao H, To KKW, Sze KH, Yung TT, Bian M, Lam H, Yeung ML, Li C, Chu H, Yuen  
696 KY. 2020. A broad-spectrum virus- and host-targeting peptide against respiratory viruses  
697 including influenza virus and SARS-CoV-2. *Nat Commun* 11:4252.
- 698
- 699 45. Lamers MM, Beumer J, van der Vaart J, Knoops K, Puschhof J, Breugem TI, Ravelli  
700 RBG, Paul van Schayck J, Mykytyn AZ, Duimel HQ, van Donselaar E, Riesebosch S,



- 701 Kuijpers HJH, Schipper D, van de Wetering WJ, de Graaf M, Koopmans M, Cuppen E,  
702 Peters PJ, Haagmans BL, Clevers H. 2020. SARS-CoV-2 productively infects human gut  
703 enterocytes. *Science* 369:50-54.  
704
- 705 46. Schlottau K, Rissmann M, Graaf A, Schon J, Sehl J, Wylezich C, Hoper D, Mettenleiter  
706 TC, Balkema-Buschmann A, Harder T, Grund C, Hoffmann D, Breithaupt A, Beer M.  
707 2020. SARS-CoV-2 in fruit bats, ferrets, pigs, and chickens: an experimental  
708 transmission study. *Lancet Microbe* 1:e218-e225.  
709
- 710 47. Shi J, Wen Z, Zhong G, Yang H, Wang C, Huang B, Liu R, He X, Shuai L, Sun Z, Zhao  
711 Y, Liu P, Liang L, Cui P, Wang J, Zhang X, Guan Y, Tan W, Wu G, Chen H, Bu Z.  
712 2020. Susceptibility of ferrets, cats, dogs, and other domesticated animals to SARS-  
713 coronavirus 2. *Science* 368:1016-1020.  
714
- 715 48. Liu Y, Hu G, Wang Y, Ren W, Zhao X, Ji F, Zhu Y, Feng F, Gong M, Ju X, Zhu Y, Cai  
716 X, Lan J, Guo J, Xie M, Dong L, Zhu Z, Na J, Wu J, Lan X, Xie Y, Wang X, Yuan Z,  
717 Zhang R, Ding Q. 2021. Functional and genetic analysis of viral receptor ACE2 orthologs  
718 reveals a broad potential host range of SARS-CoV-2. *Proc Natl Acad Sci U S A* 118.  
719 49. Rendon-Marin S, Martinez-Gutierrez M, Whittaker GR, Jaimes JA, Ruiz-Saenz J. 2021.  
720 SARS CoV-2 Spike Protein in silico Interaction With ACE2 Receptors From Wild and  
721 Domestic Species. *Front Genet* 12:571707.  
722

- 723 50. Meekins DA, Morozov I, Trujillo JD, Gaudreault NN, Bold D, Carossino M, Artiaga BL,  
724 Indran SV, Kwon T, Balaraman V, Madden DW, Feldmann H, Henningson J, Ma W,  
725 Balasuriya UBR, Richt JA. 2020. Susceptibility of swine cells and domestic pigs to  
726 SARS-CoV-2. *Emerg Microbes Infect* 9:2278-2288.  
727
- 728 51. Vergara-Alert J, Rodon J, Carrillo J, Te N, Izquierdo-Useros N, Rodriguez de la  
729 Concepcion ML, Avila-Nieto C, Guallar V, Valencia A, Cantero G, Blanco J, Clotet B,  
730 Bensaïd A, Segales J. 2020. Pigs are not susceptible to SARS-CoV-2 infection but are a  
731 model for viral immunogenicity studies. *Transbound Emerg Dis* doi:10.1111/tbed.13861.  
732
- 733 52. Pickering BS, Smith G, Pinette MM, Embury-Hyatt C, Moffat E, Marszal P, Lewis CE.  
734 2021. Susceptibility of Domestic Swine to Experimental Infection with Severe Acute  
735 Respiratory Syndrome Coronavirus 2. *Emerg Infect Dis* 27:104-112.  
736
- 737 53. Zhang HL, Li YM, Sun J, Zhang YY, Wang TY, Sun MX, Wang MH, Yang YL, Hu XL,  
738 Tang YD, Zhao J, Cai X. 2021. Evaluating angiotensin-converting enzyme 2-mediated  
739 SARS-CoV-2 entry across species. *J Biol Chem* 296:100435.  
740
- 741 54. Zhai X, Sun J, Yan Z, Zhang J, Zhao J, Zhao Z, Gao Q, He WT, Veit M, Su S. 2020.  
742 Comparison of Severe Acute Respiratory Syndrome Coronavirus 2 Spike Protein Binding  
743 to ACE2 Receptors from Human, Pets, Farm Animals, and Putative Intermediate Hosts. *J*  
744 *Virol* 94.  
745

746 **Figure Legend**

747 **Figure 1. DF1 and MDCK cells expressing the human ACE2 (with GFP marker) and**  
748 **TMPRSS2 (with RFP marker) genes.** DF1 and MDCK cells were transduced with lentivirus  
749 containing the human ACE2 gene and cells were FACS purified based on GFP expression.  
750 Lentivirus containing the humanTMPRSS2 gene was then transduced into the human-ACE2  
751 expressing DF1 and MDCK cells. Following two-color FACS for GFP and RFP expressing cells,  
752 dual positive cells were grown for 48 hours in an 8-chamber glass slide. Fluorescence was  
753 captured on an EVOS M5000 with added DAPI nuclear stain (blue) GFP and RFP.

754

755 **Figure 2. Detection of human ACE2 and human TMPRSS2 expression in DF1 ++ and**  
756 **MDCK ++ cells.** (A) DF1, DF1 ++, MDCK, MDCK ++ and Vero cells were grown at 37C in  
757 5% CO<sub>2</sub>. After 72 hours, RNA was extracted and primers specific for human ACE2 and human  
758 TMPRSS2 were used with RT-PCR to confirm expression in DF1 ++ and MDCK ++ cell lines.  
759 (B) Differential expression of human and chicken ACE2 in DF1, DF1 ++, MDCK, and MDCK  
760 ++ cell lines with primers specific for both. (C) Fifteen micrograms of protein were extracted  
761 from each cell line and separated by SDS-PAGE. Following transfer to nitrocellulose,  
762 membranes were probed by western blot using rabbit monoclonal antibodies to the human ACE2  
763 and TMPRSS2 proteins.

764

765 **Figure 3. Growth of SARS-CoV-2 on DF1 and MDCK cells expressing either human**  
766 **ACE2, human TMPRSS2, or both (++)**. (A) DF1, DF1 expressing human ACE2, DF1  
767 expressing human TMPRSS2, DF1 expressing both human ACE2 and TMPRSS2 (++) , MDCK,

768 MDCK expressing human ACE2, MDCK expressing human TMPRSS2, MDCK expressing both  
769 human ACE2 and TMPRSS2 (++), and Vero cells were inoculated with SC2 at multiplicity of  
770 infection (MOI) of 1. At time points indicated, supernatant samples were taken for RNA  
771 extraction and determination of viral titers by RT-PCR. The values shown are mean +/- standard  
772 deviation of triplicate samples. Two-way analysis of variance with Tukeys multiple comparison  
773 test was performed on titers at 48 hours post inoculation to determine the statistical difference in  
774 virus titer between the cell lines. Lines with different lowercase letters indicate differences  
775 ( $p<0.05$ ). (B) Pass 2 of virus from cell culture lines expressing human ACE2, TMPRSS2, or  
776 both. After 72 hours of growth, supernatants of pass 1 were transferred onto fresh monolayers of  
777 cells, allowed to absorb for 1 hour and removed. Fresh media was added and samples were taken  
778 at time points indicated to determine virus titer by RT-PCR. Statistical analysis was performed at  
779 48 hours post inoculation. ND=Not detected.

780

781 **Figure 4. SARS-CoV-2-induced cytopathic effect and viral detection by**  
782 **immunohistochemistry in cells expressing human ACE2 and TMPRSS2.** Vero, DF1, DF1  
783 expressing both human ACE2 and TMPRSS2 (++), MDCK, and MDCK expressing both human  
784 ACE2 and TMPRSS2 (++) were grown at 37C in 5% CO<sub>2</sub> on glass chamber slides. Cells were  
785 inoculated with SC2 at MOI of 1. At 48 hours post inoculation monolayers were examined for  
786 cytopathic effect and detection of virus with rabbit monoclonal antibodies against SC2 spike and  
787 nucleoprotein. Cells were washed 3 times with PBS and incubated in the secondary antibody,  
788 goat anti-rabbit IgG H&L (Alexa Fluor® 555) for one hour at room temperature. Cells were then  
789 washed counterstained with DAPI. Immunofluorescence was visualized with an EVOS 5000.

790

791 **Figure 5. Transgenic DF1 cells expressing different animal species ACE2 and TMPRSS2**

792 **genes.** (A) DF1 cells were transfected with PiggyBac® plasmid containing the ACE2 and  
793 TMPRSS2 genes from house cat (*Felis catus*), horse (*Equus ferus*), domestic pig (*Sus*  
794 *domesticus*), goat (*Capra aegagrus*), Golden hamster (*Mesocricetus auratus*), Little Brown bat  
795 (*Myotis lucifugus*) and Great Roundleaf bat (*Hipposideros armiger*). Cells were first created with  
796 the animal ACE2 gene and FACS purified based on GFP expression. The animal TMPRSS2  
797 gene was then transfected into the DF1 cells expressing the animal ACE2 gene. Two-color  
798 FACS was performed based on GFP and RFP expression. Transgenic cells expressing animal  
799 ACE2 and TMPRSS2 were grown at 37C in 5% CO<sub>2</sub>. After 72 hours, RNA was extracted and  
800 primers specific for the animals ACE2 and animal TMPRSS2 were used with RT-PCR to  
801 confirm animal species ACE2 and TMPRSS2 expression in DF1 cells.

802

803 **Figure 6. Growth of SARS-CoV-2 in DF1 cells expressing ACE2 and TMPRSS2 from**

804 **different animal species.** (A) DF1 cells expressing cat, horse, pig, goat, Golden hamster, Little  
805 Brown bat, and Great Roundleaf bat were inoculated with SC2 at multiplicity of infection (MOI)  
806 of 1. At time points indicated, supernatant samples were taken for RNA extraction and  
807 determination of viral titers with RT-PCR. The values shown are mean +/- standard deviation of  
808 triplicate samples. Two-way analysis of variance with Tukeys multiple comparison test was  
809 performed on titers at 48 hours post inoculation to determine the statistical difference in virus  
810 titer between the cell lines. Lines with different lowercase letters indicate differences (p<0.05).  
811 (B) Pass 2 of virus from cell culture lines animal species ACE2 and TMPRSS2. After 72 hours

812 of growth, supernatants of pass 1 were transferred onto fresh monolayers of cells, allowed to  
813 absorb for 1 hour and removed. Fresh media was added and samples were taken at time points  
814 indicated to determine virus titer with RT-PCR. Statistical analysis was performed at 48 hours  
815 post inoculation. ND=Not detected.

816

817 **Figure 7. SARS-CoV-2 induced cytopathic effect and viral detection by**  
818 **immunohistochemistry in DF1 cells expressing animal species ACE2 and TMPRSS2.** DF1  
819 cells expressing animal ACE2 and TMPRSS2 were grown at 37C in 5% CO<sub>2</sub> on glass chamber  
820 slides. Cells were inoculated with SC2 at MOI of 1. At 48 hours post inoculation monolayers  
821 were examined for cytopathic effect and detection of virus with rabbit monoclonal antibodies  
822 against SC2 spike and nucleoprotein. Cells were washed 3 times with PBS and incubated in the  
823 secondary antibody, goat anti-rabbit IgG H&L (Alexa Fluor® 555) for one hour at room  
824 temperature. Cells were then washed counterstained with DAPI. Immunofluorescence was  
825 visualized with an EVOS 5000.

827 Figure 1.

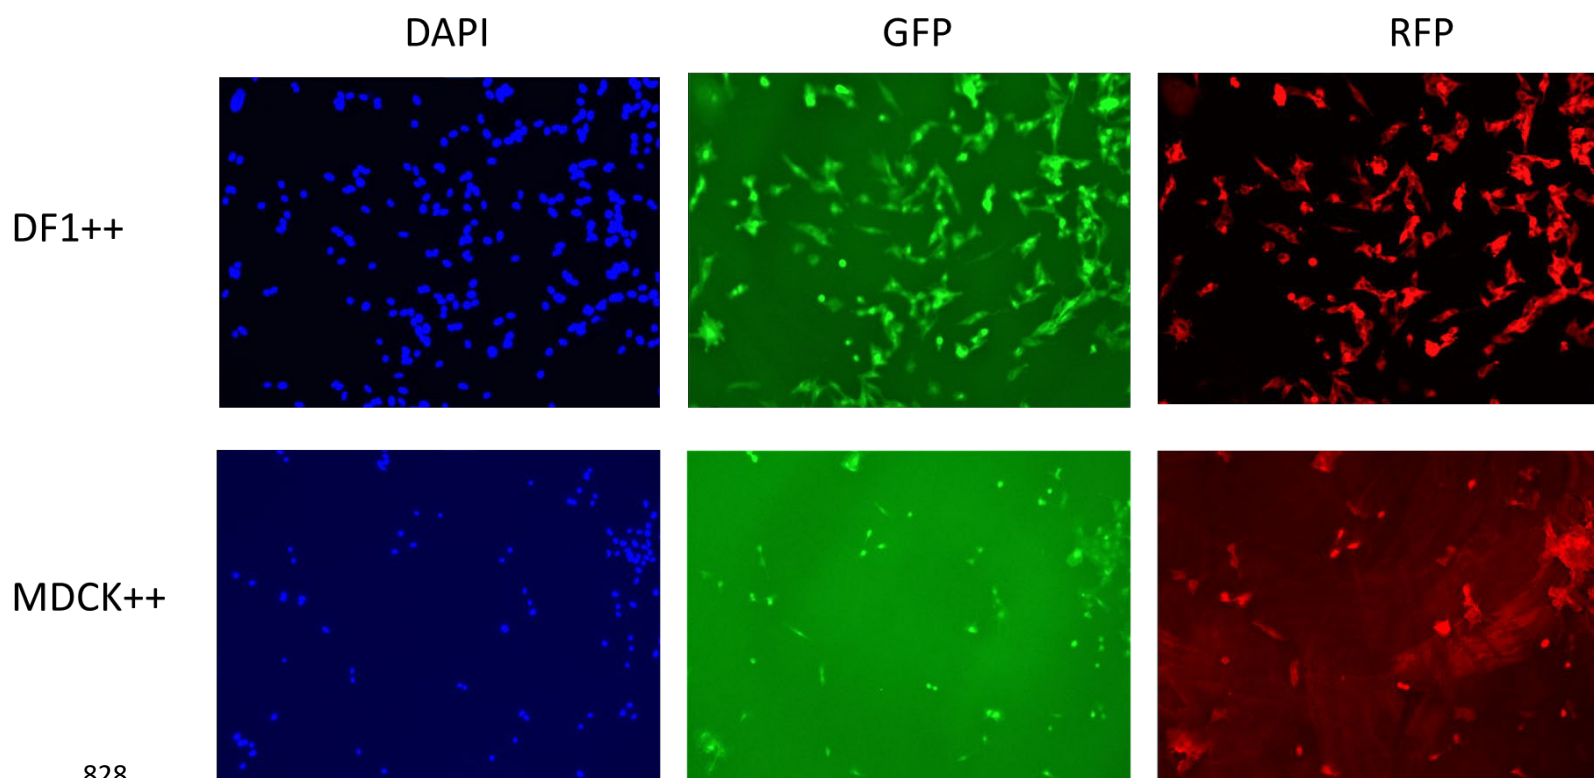

828

829

830

831

832

833 Figure 2.

834 A.

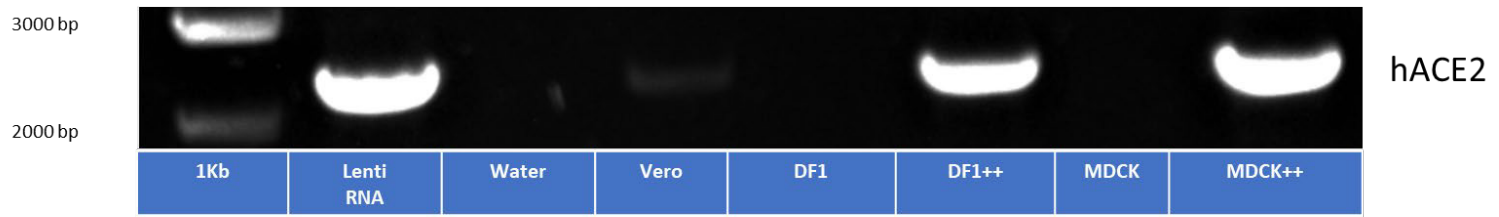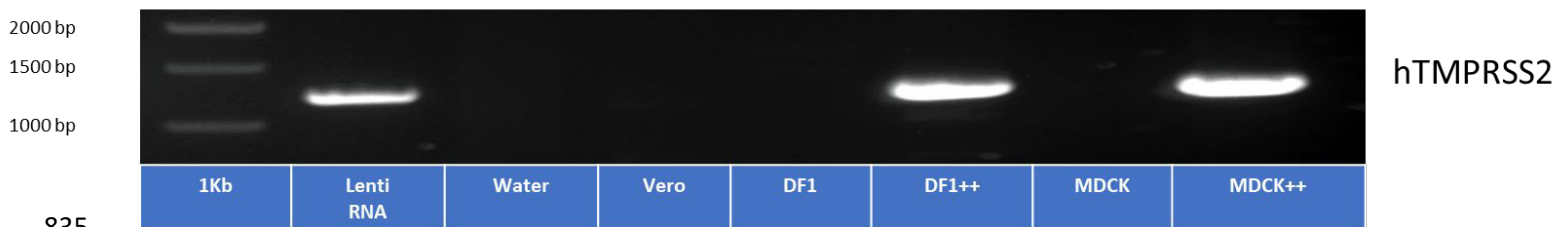

835

836

837 B.

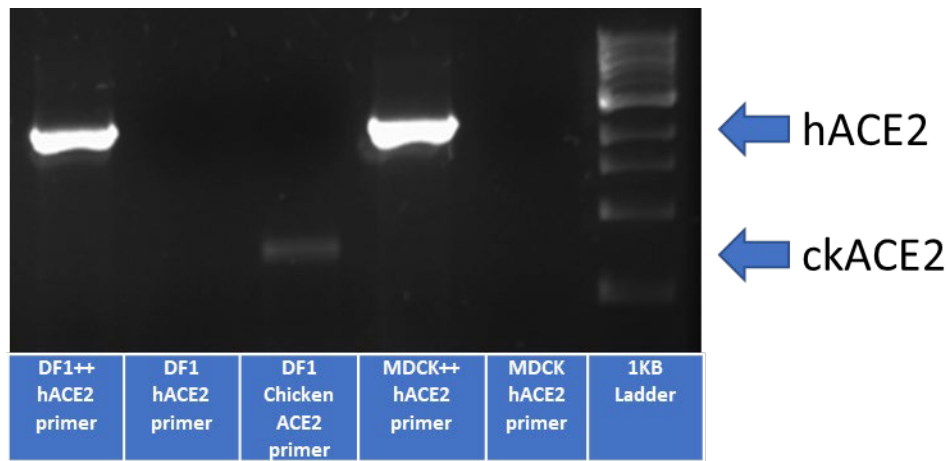

838

839

840

841

842

843



844 C.

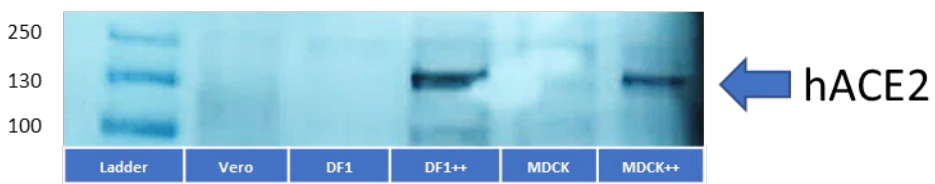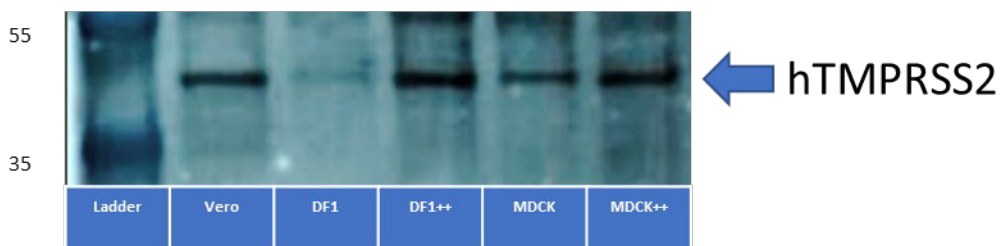

845

846

847 Figure 3.

A

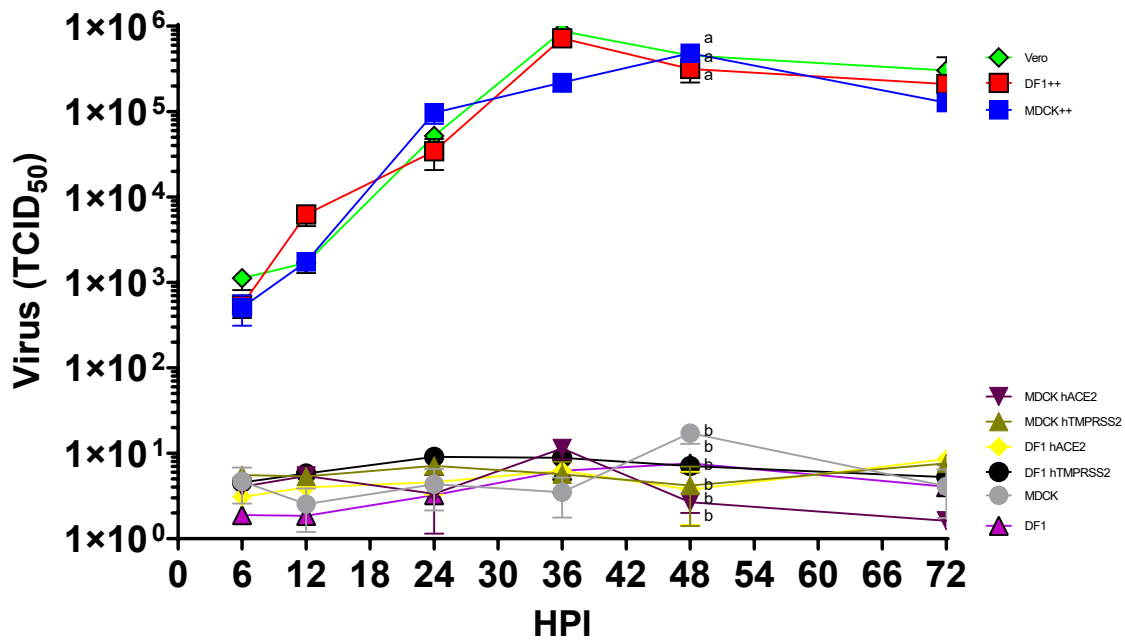

B

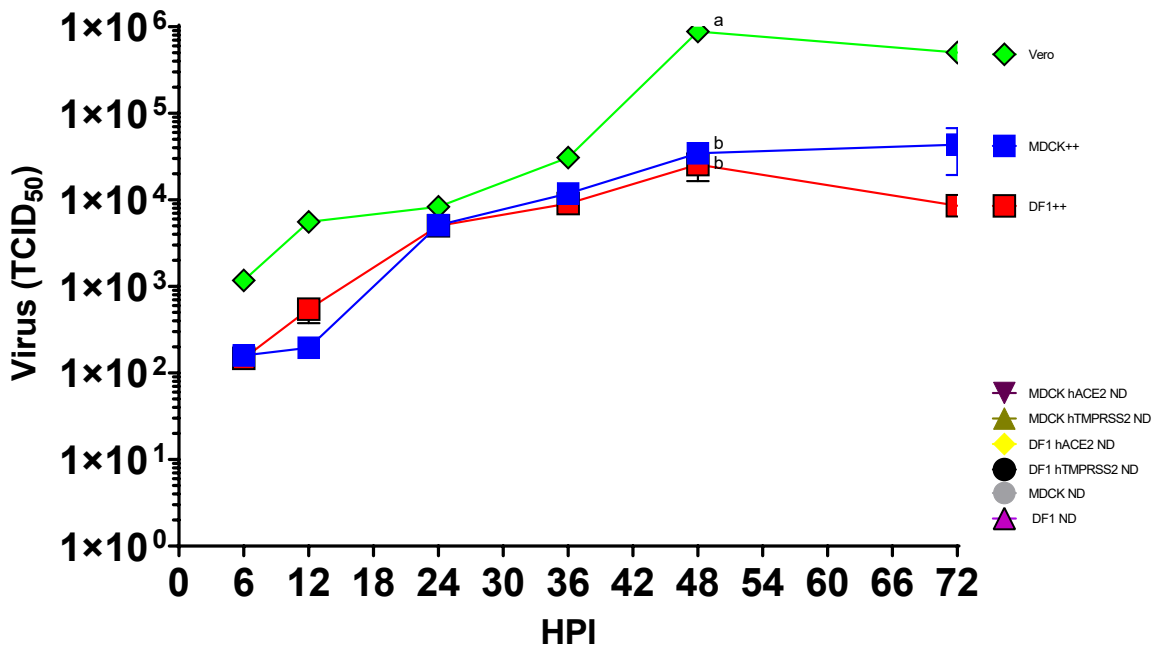

848

849 Figure 4.

850

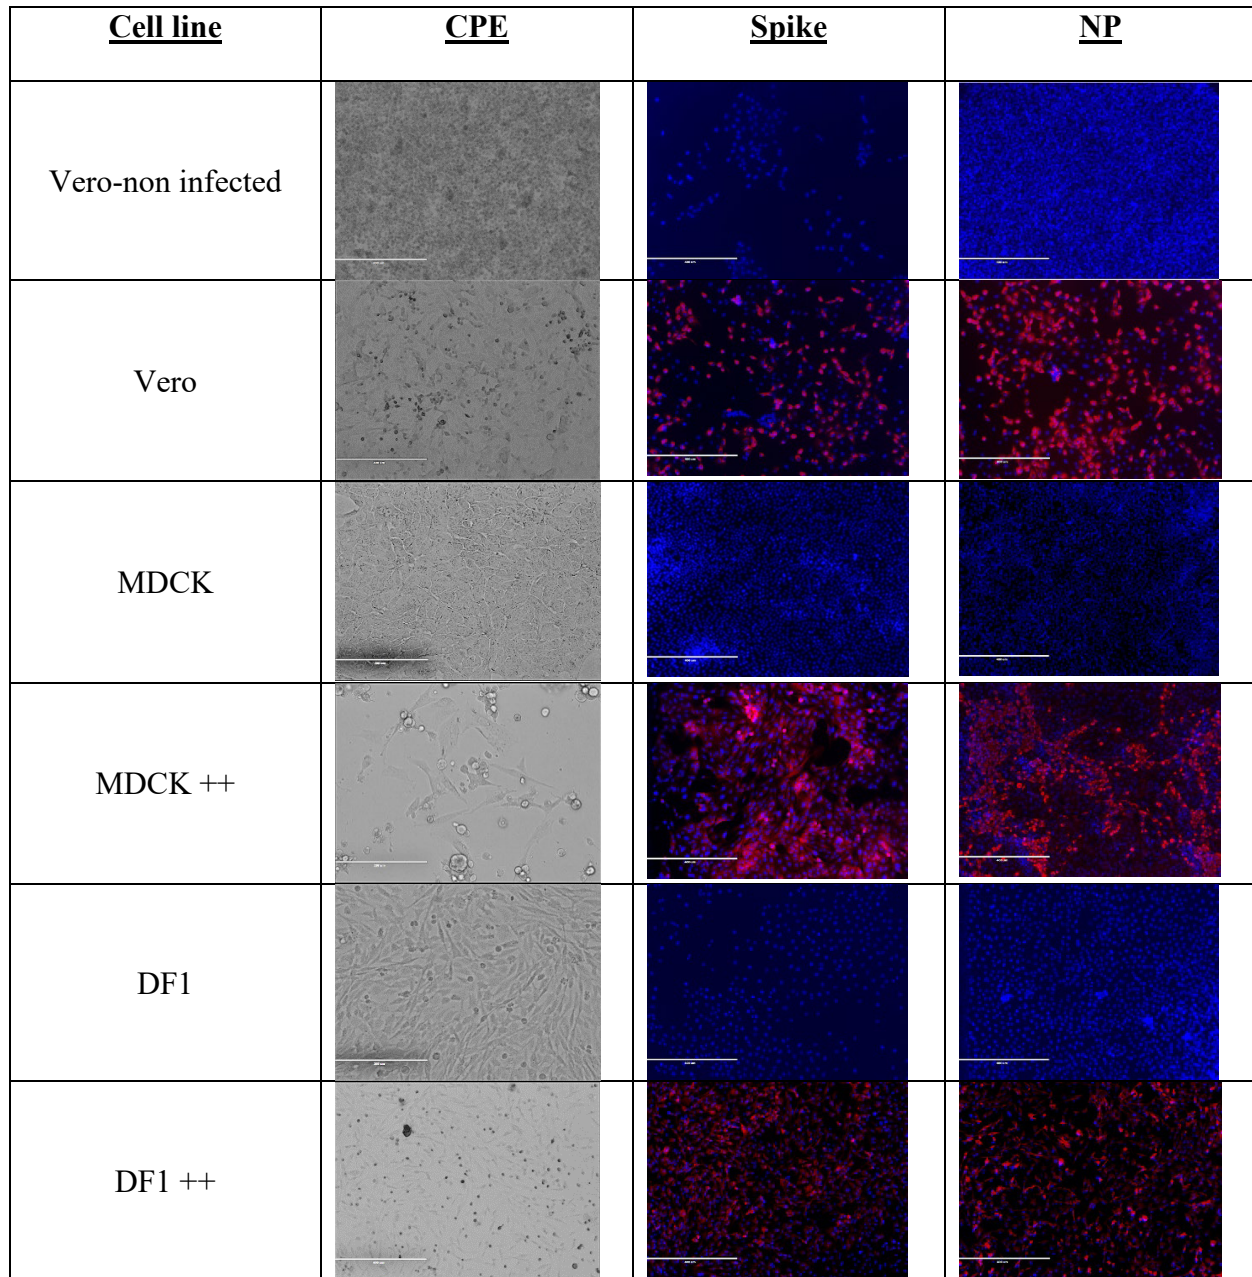

851

852

853 Figure 5.

854 ACE2

855

856

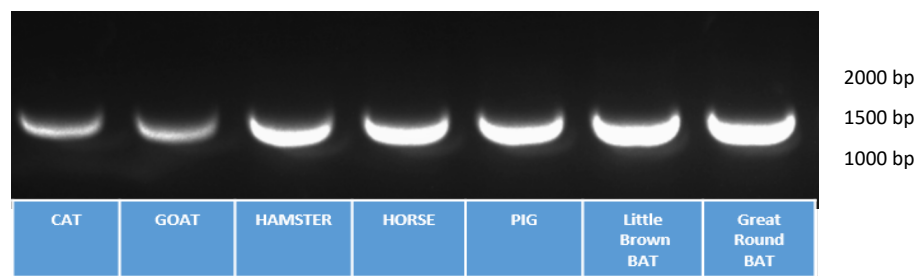

TMPRSS2

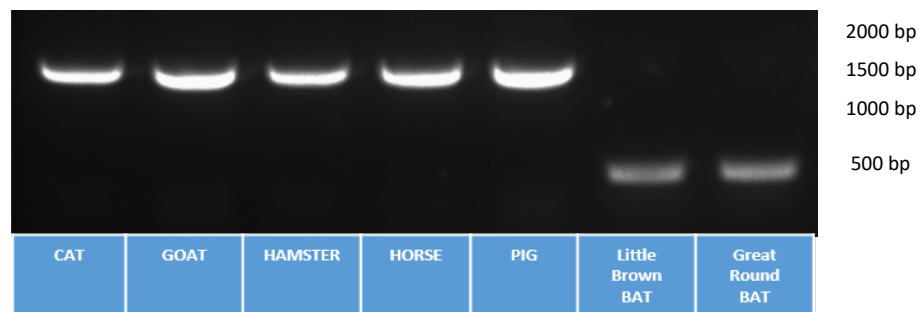

857 Figure 6.

858 A.

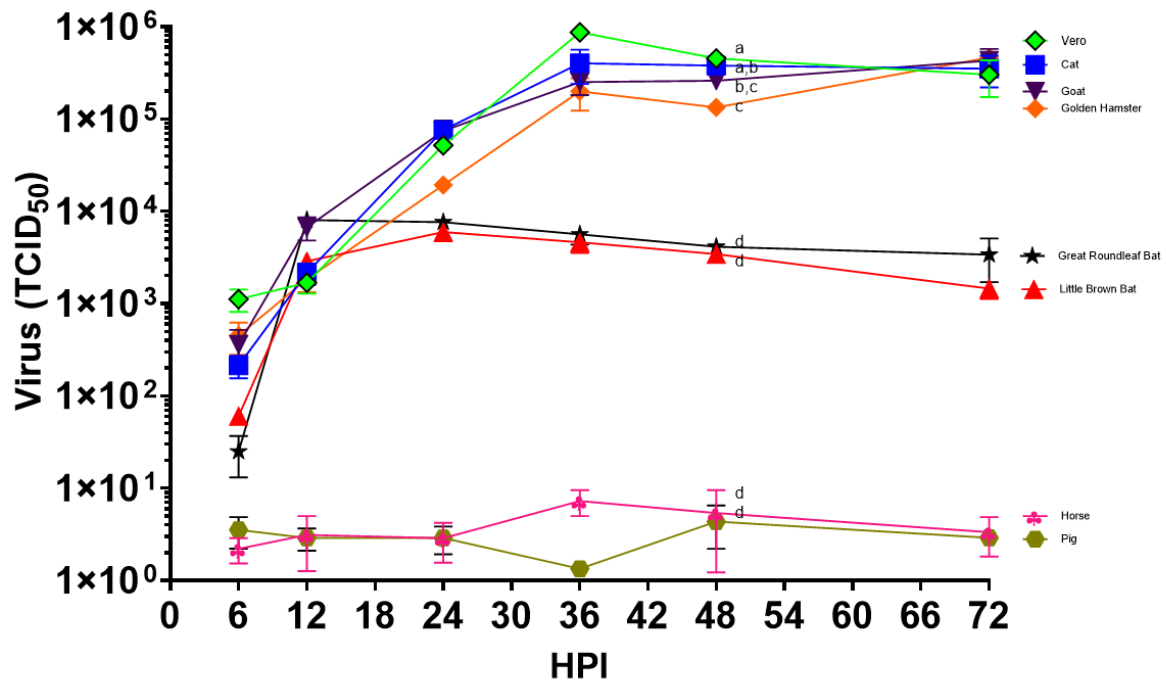

859 B.

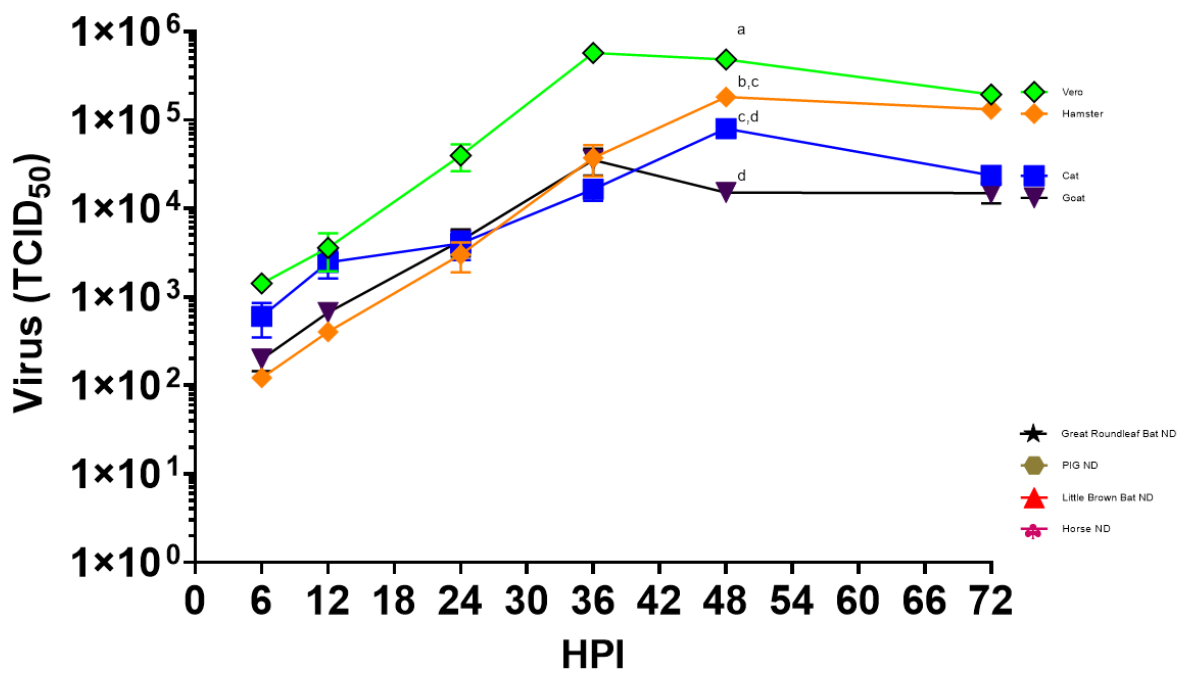

860

860

861 Figure 7.

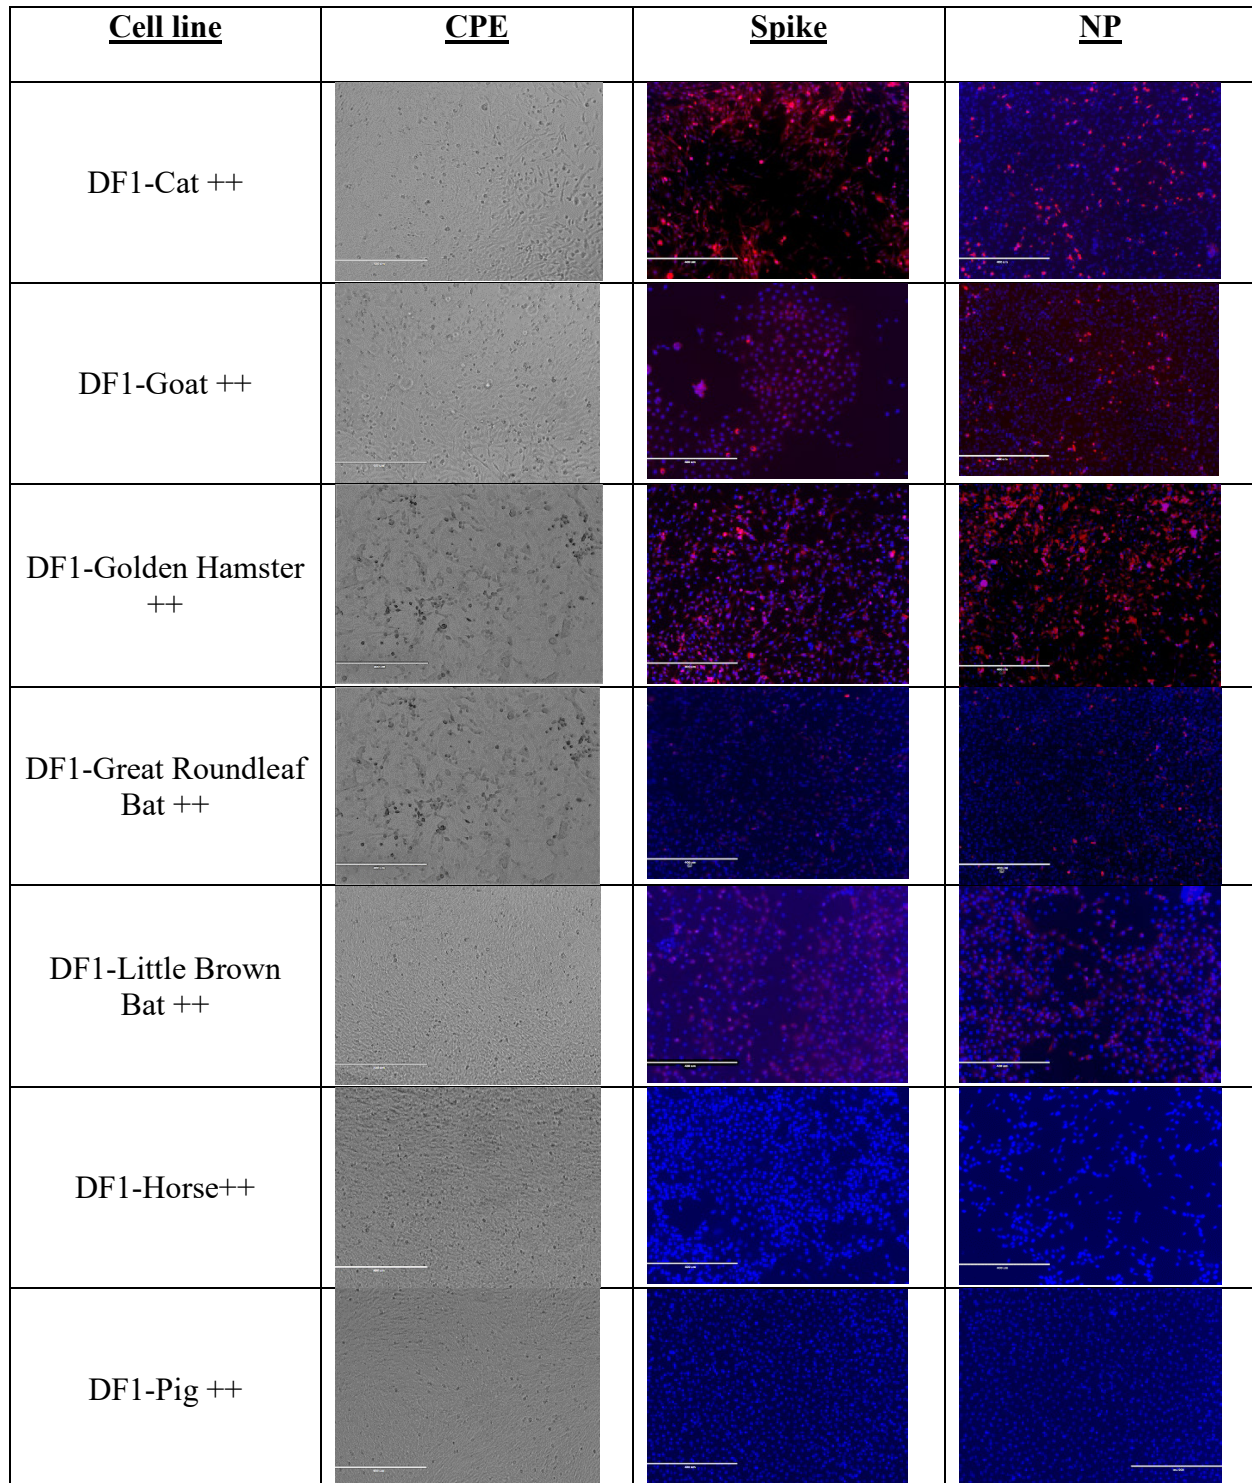

862

863
